# Supplementary material for: The prognostic and immunological role of MYB: from bladder cancer validation to pan-cancer analysis
Source: Oxford University Press journal article supplement (doi:10.1042/bsr20222627), 2023-03-30
Supplement: bsr-2022-2627_supp.pdf [file bsr-2022-2627_supp.pdf]

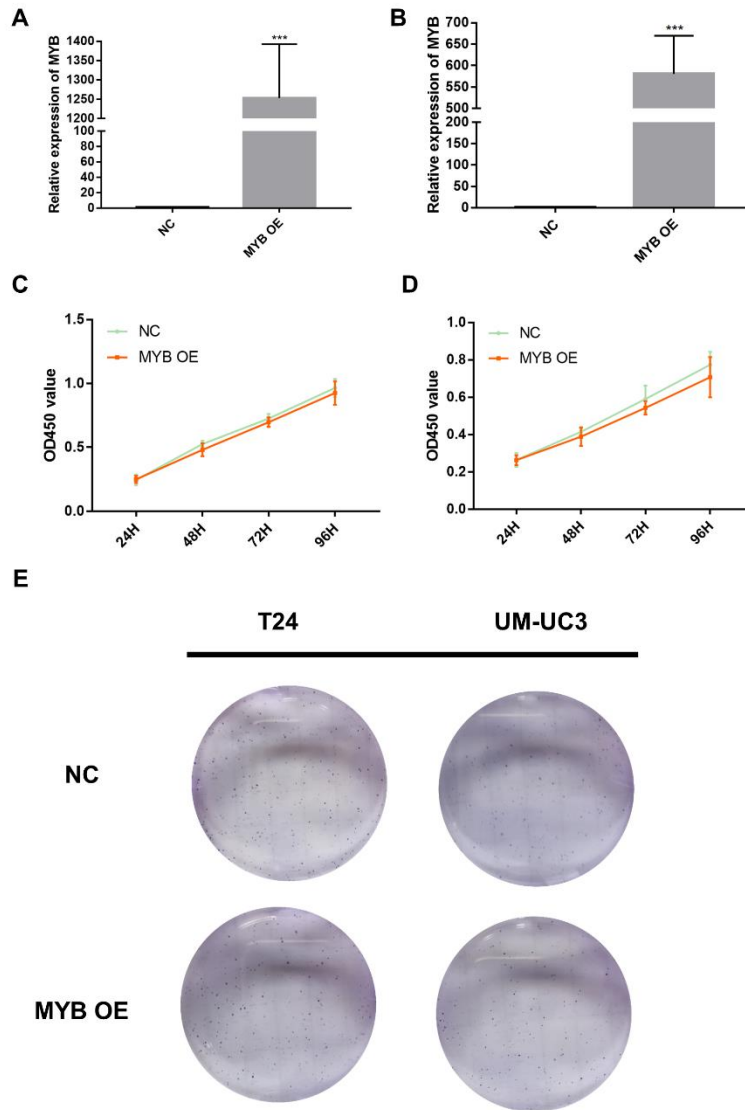

Supplementary Figure 1: MYB has no effect on bladder cancer cell proliferation. (A) The overexpression efficiency of MYB in T24 cells was identified by qRT-PCR. (B) The overexpression efficiency of MYB in UM-UC3 cells was identified by qRT-PCR. (C) The CCK-8 experiment confirmed that overexpression of MYB had no effect on the proliferation of T24 cells. (D) The CCK-8 experiment confirmed that overexpression of MYB had no effect on the proliferation of UM-UC3 cells. (E) The colony formation assay confirmed that overexpression of MYB had no effect on the proliferation of T24 and UM-UC3 cells.
